# Supplementary material for: Publications of systematic review and meta-analysis in the indexed anesthesia journals: a 10-year bibliometric analysis
Source: Front Med (Lausanne). 2025 May 7;12:1523630. doi: 10.3389/fmed.2025.1523630 (PMC12092347; doi:10.3389/fmed.2025.1523630)
Supplement: SUPPLEMENTARY 4 — Highly cited papers. [file Table_4.XLSX]

## Sheet: savedrecs
Timespan:2013-2023.
Results found	36
Sum of the Times Cited	8558
Average Citations per Item	237.72
h-index	31
Title	Authors	Corporate Authors	Editors	Book Editors	Source Title	Publication Date	Publication Year	Volume	Issue	Part Number	Supplement	Special Issue	Beginning Page	Ending Page	Article Number	DOI	Conference Title	Conference Date	Total Citations	Average per Year	2013	2014	2015	2016	2017	2018	2019	2020	2021	2022	2023
Neuropathic pain in the general population: A systematic review of epidemiological studies	van Hecke, O.; Austin, Sophie K.; Khan, Rafi A.; Smith, B. H.; Torrance, N.				PAIN	APR 2014	2014	155	4				654	662		10.1016/j.pain.2013.11.013			907	82.45	0	19	34	45	69	66	103	140	168	137	123	904
Incidence, prevalence, and predictors of chemotherapy-induced peripheral neuropathy: A systematic review and meta-analysis	Seretny, Marta; Currie, Gillian L.; Sena, Emily S.; Ramnarine, Sabrina; Grant, Robin; MacLeod, Malcolm R.; Colvin, Leslie A.; Fallon, Marie				PAIN	DEC 2014	2014	155	12				2461	2470		10.1016/j.pain.2014.09.020			812	73.82	0	0	13	31	62	75	116	127	128	140	115	807
Rates of opioid misuse, abuse, and addiction in chronic pain: a systematic review and data synthesis	Vowles, Kevin E.; McEntee, Mindy L.; Julnes, Peter Siyahhan; Frohe, Tessa; Ney, John P.; van der Goes, David N.				PAIN	APR 2015	2015	156	4				569	576		10.1097/01.j.pain.0000460357.01998.f1			764	76.4	0	0	10	35	46	86	116	131	142	117	79	762
Management of severe perioperative bleeding <i>Guidelines from the European Society of Anaesthesiology</i>	Kozek-Langenecker, Sibylle A.; Afshari, Arash; Albaladejo, Pierre; Alvarez Santullano, Cesar Aldecoa; De Robertis, Edoardo; Filipescu, Daniela C.; Fries, Dietmar; Goerlinger, Klaus; Haas, Thorsten; Imberger, Georgina; Jacob, Matthias; Lance, Marcus; Llau, Juan; Mallett, Sue; Meier, Jens; Rahe-Meyer, Niels; Samama, Charles Marc; Smith, Andrew; Solomon, Cristina; Van der Linden, Philippe; Wikkelso,…				EUROPEAN JOURNAL OF ANAESTHESIOLOGY	JUN 2013	2013	30	6				270	382		10.1097/EJA.0b013e32835f4d5b			567	47.25	14	71	97	104	88	65	28	38	29	23	10	567
Impact of perioperative dexamethasone on postoperative analgesia and side-effects: systematic review and meta-analysis	Waldron, N. H.; Jones, C. A.; Gan, T. J.; Allen, T. K.; Habib, A. S.				BRITISH JOURNAL OF ANAESTHESIA	FEB 2013	2013	110	2				191	200		10.1093/bja/aes431			386	32.17	8	34	28	32	41	51	47	42	38	38	27	386
Opioid-induced hyperalgesia in patients after surgery: a systematic review and a meta-analysis	Fletcher, D.; Martinez, V.				BRITISH JOURNAL OF ANAESTHESIA	JUN 2014	2014	112	6				991	1004		10.1093/bja/aeu137			365	33.18	0	3	18	31	40	40	44	42	49	55	42	364
Intraoperative hypotension and the risk of postoperative adverse outcomes: a systematic review	Wesselink, E. M.; Kappen, T. H.; Torn, H. M.; Slooter, A. J. C.; van Klei, W. A.				BRITISH JOURNAL OF ANAESTHESIA	OCT 2018	2018	121	4				706	721		10.1016/j.bja.2018.04.036			363	51.86	0	0	0	0	0	2	28	68	88	87	88	361
Fourth Consensus Guidelines for the Management of Postoperative Nausea and Vomiting	Gan, Tong J.; Belani, Kumar G.; Bergese, Sergio; Chung, Frances; Diemunsch, Pierre; Habib, Ashraf S.; Jin, Zhaosheng; Kovac, Anthony L.; Meyer, Tricia A.; Urman, Richard D.; Apfel, Christian C.; Ayad, Sabry; Beagley, Linda; Candiotti, Keith; Englesakis, Marina; Hedrick, Traci L.; Kranke, Peter; Lee, Samuel; Lipman, Daniel; Minkowitz, Harold S.; Morton, John; Philip, Beverly K.				ANESTHESIA AND ANALGESIA	AUG 2020	2020	131	2				411	448		10.1213/ANE.0000000000004833			351	70.2	0	0	0	0	0	0	0	23	81	102	142	348
Enhanced Recovery After Surgery (ERAS) for gastrointestinal surgery, part 2: consensus statement for anaesthesia practice	Feldheiser, A.; Aziz, O.; Baldini, G.; Cox, B. P. B. W.; Fearon, K. C. H.; Feldman, L. S.; Gan, T. J.; Kennedy, R. H.; Ljungqvist, O.; Lobo, D. N.; Miller, T.; Radtke, F. F.; Ruiz Garces, T.; Schricker, T.; Scott, M. J.; Thacker, J. K.; Ytrebo, L. M.; Carli, F.				ACTA ANAESTHESIOLOGICA SCANDINAVICA	MAR 2016	2016	60	3				289	334		10.1111/aas.12651			351	39	0	0	1	11	28	42	67	61	51	47	43	351
Predictors of persistent pain after total knee arthroplasty: a systematic review and meta-analysis	Lewis, G. N.; Rice, D. A.; McNair, P. J.; Kluger, M.				BRITISH JOURNAL OF ANAESTHESIA	APR 2015	2015	114	4				551	561		10.1093/bja/aeu441			338	33.8	0	0	8	27	34	30	43	45	52	57	42	338
Acceptance and Commitment Therapy (ACT) for Chronic Pain: A Systematic Review and Meta-Analyses	Hughes, Laura S.; Clark, Jodi; Colclough, Janette A.; Dale, Elizabeth; McMillan, Dean				CLINICAL JOURNAL OF PAIN	JUN 2017	2017	33	6				552	568		10.1097/AJP.0000000000000425			327	40.88	0	0	0	0	6	19	33	58	75	76	59	326
How does pain lead to disability? A systematic review and meta-analysis of mediation studies in people with back and neck pain	Lee, Hopin; Huebscher, Markus; Moseley, G. Lorimer; Kamper, Steven J.; Traeger, Adrian C.; Mansell, Gemma; McAuley, James H.				PAIN	JUN 2015	2015	156	6				988	997		10.1097/j.pain.0000000000000146			306	30.6	0	0	3	19	22	31	39	42	46	52	52	306
Reliability of conditioned pain modulation: a systematic review	Kennedy, Donna L.; Kemp, Harriet I.; Ridout, Deborah; Yarnitsky, David; Rice, Andrew S. C.				PAIN	NOV 2016	2016	157	11				2410	2419		10.1097/j.pain.0000000000000689			272	30.22	0	0	0	1	15	26	40	46	64	40	40	272
Outcomes from intensive care in patients with COVID-19: a systematic review and meta-analysis of observational studies	Armstrong, R. A.; Kane, A. D.; Cook, T. M.				ANAESTHESIA	OCT 2020	2020	75	10				1340	1349		10.1111/anae.15201			262	52.4	0	0	0	0	0	0	0	24	132	77	29	262
Cannabis and cannabinoids for the treatment of people with chronic noncancer pain conditions: a systematic review and meta-analysis of controlled and observational studies	Stockings, Emily; Campbell, Gabrielle; Hall, Wayne D.; Nielsen, Suzanne; Zagic, Dino; Rahman, Rakin; Murnion, Bridin; Farrell, Michael; Weier, Megan; Degenhardt, Louisa				PAIN	OCT 2018	2018	159	10				1932	1954		10.1097/j.pain.0000000000001293			243	34.71	0	0	0	0	0	6	45	60	60	43	26	240
Core outcome measurement instruments for clinical trials in nonspecific low back pain	Chiarotto, Alessandro; Boers, Maarten; Deyo, Richard A.; Buchbinder, Rachelle; Corbin, Terry P.; Costa, Leonardo O. P.; Foster, Nadine E.; Grotle, Margreth; Koes, Bart W.; Kovacs, Francisco M.; Lin, C-W. Christine; Maher, Chris G.; Pearson, Adam M.; Peul, Wilco C.; Schoene, Mark L.; Turk, Dennis C.; van Tulder, Maurits W.; Terwee, Caroline B.; Ostelo, Raymond W.				PAIN	MAR 2018	2018	159	3				481	495		10.1097/j.pain.0000000000001117			222	31.71	0	0	0	0	0	7	33	44	59	41	38	222
Systematic Review and Meta-analysis of Virtual Reality in Pediatrics: Effects on Pain and Anxiety	Eijlers, Robin; Utens, Elisabeth M. W. J.; Staals, Lonneke M.; de Nijs, Pieter F. A.; Berghmans, Johan M.; Wijnen, Rene M. H.; Hillegers, Manon H. J.; Dierckx, Bram; Legerstee, Jeroen S.				ANESTHESIA AND ANALGESIA	NOV 2019	2019	129	5				1344	1353		10.1213/ANE.0000000000004165			209	34.83	0	0	0	0	0	0	1	29	49	61	65	205
Difficult Airway Society guidelines for awake tracheal intubation (ATI) in adults	Ahmad, I.; El-Boghdadly, K.; Bhagrath, R.; Hodzovic, I.; McNarry, A. F.; Mir, F.; O'Sullivan, E. P.; Patel, A.; Stacey, M.; Vaughan, D.				ANAESTHESIA	APR 2020	2020	75	4				509	528		10.1111/anae.14904			200	33.33	0	0	0	0	0	0	2	36	53	61	47	199
Pre-operative evaluation of adults undergoing elective noncardiac surgery <i>Updated guideline from the European Society of Anaesthesiology</i>	De Hert, Stefan; Staender, Sven; Fritsch, Gerhard; Hinkelbein, Jochen; Afshari, Arash; Bettelli, Gabriella; Bock, Matthias; Chew, Michelle S.; Coburn, Mark; De Robertis, Edoardo; Drinhaus, Hendrik; Feldheiser, Aarne; Geldner, Gotz; Lahner, Daniel; Macas, Andrius; Neuhaus, Christopher; Rauch, Simon; Santos-Ampuero, Maria Angeles; Solca, Maurizio; Tanha, Nima; Traskaite, Vilma; Wagner, Gernot; Wapp…				EUROPEAN JOURNAL OF ANAESTHESIOLOGY	JUN 2018	2018	35	6				407	465		10.1097/EJA.0000000000000817			187	26.71	0	0	0	0	0	4	32	36	43	35	36	186
Analgesic impact of intra-operative opioids vs. opioid-free anaesthesia: a systematic review and meta-analysis	Frauenknecht, J.; Kirkham, K. R.; Jacot-Guillarmod, A.; Albrecht, E.				ANAESTHESIA	MAY 2019	2019	74	5				651	662		10.1111/anae.14582			157	26.17	0	0	0	0	0	0	10	21	44	46	35	156
Perioperative Use of Gabapentinoids for the Management of Postoperative Acute Pain A Systematic Review and Meta-analysis	Verret, Michael; Lauzier, Francois; Zarychanski, Ryan; Perron, Caroline; Savard, Xavier; Pinard, Anne-Marie; Leblanc, Guillaume; Cossi, Marie-Joelle; Neveu, Xavier; Turgeon, Alexis F.	Canadian Perioperative Anesthesia			ANESTHESIOLOGY	AUG 2020	2020	133	2				265	279		10.1097/ALN.0000000000003428			152	30.4	0	0	0	0	0	0	0	8	46	47	49	150
Effects of dexmedetomidine on perioperative stress, inflammation, and immune function: systematic review and meta-analysis	Wang, Kun; Wu, Mengge; Xu, Jian; Wu, Changshuai; Zhang, Baohui; Wang, Guonian; Ma, Daqing				BRITISH JOURNAL OF ANAESTHESIA	DEC 2019	2019	123	6				777	794		10.1016/j.bja.2019.07.027			140	23.33	0	0	0	0	0	0	0	13	34	43	49	139
Minimal clinically important differences in randomised clinical trials on pain management after total hip and knee arthroplasty: a systematic review	Laigaard, Jens; Pedersen, Casper; Ronsbo, Thea Norgaard; Mathiesen, Ole; Karlsen, Anders Peder Hojer				BRITISH JOURNAL OF ANAESTHESIA	MAY 2021	2021	126	5				1029	1037		10.1016/j.bja.2021.01.021			129	32.25	0	0	0	0	0	0	0	0	11	69	44	124
Mortality in patients admitted to intensive care with COVID-19: an updated systematic review and meta-analysis of observational studies	Armstrong, R. A.; Kane, A. D.; Kursumovic, E.; Oglesby, F. C.; Cook, T. M.				ANAESTHESIA	APR 2021	2021	76	4				537	548		10.1111/anae.15425			92	23	0	0	0	0	0	0	0	1	26	45	19	91
Cannabinoids, cannabis, and cannabis-based medicine for pain management: a systematic review of randomised controlled trials	Fisher, Emma; Moore, R. Andrew; Fogarty, Alexandra E.; Finn, David P.; Finnerup, Nanna B.; Gilron, Ian; Haroutounian, Simon; Krane, Elliot; Rice, Andrew S. C.; Rowbotham, Michael; Wallace, Mark; Eccleston, Christopher				PAIN	JUL 2021	2021	162			1		S45	S66		10.1097/j.pain.0000000000001929			79	19.75	0	0	0	0	0	0	0	1	23	25	26	75
Prospectively assessed neurodevelopmental outcomes in studies of anaesthetic neurotoxicity in children: a systematic review and meta-analysis	Ing, Caleb; Jackson, William M.; Zaccariello, Michael J.; Goldberg, Terry E.; McCann, Mary-Ellen; Grobler, Anneke; Davidson, Andrew; Sun, Lena; Li, Guohua; Warner, David O.				BRITISH JOURNAL OF ANAESTHESIA	FEB 2021	2021	126	2				433	444		10.1016/j.bja.2020.10.022			70	17.5	0	0	0	0	0	0	0	0	14	26	30	70
Time course prevalence of post-COVID pain symptoms of musculoskeletal origin in patients who had survived severe acute respiratory syndrome coronavirus 2 infection: a systematic review and meta-analysis	Fernandez-de-las-Penas, Cesar; Navarro-Santana, Marcos; Plaza-Manzano, Gustavo; Palacios-Cena, Domingo; Arendt-Nielsen, Lars				PAIN	JUL 2022	2022	163	7				1220	1231		10.1097/j.pain.0000000000002496			63	21	0	0	0	0	0	0	0	0	0	26	37	63
Prehabilitation in adult patients undergoing surgery: an umbrella review of systematic reviews	McIsaac, Daniel I.; Gill, Marlyn; Boland, Laura; Hutton, Brian; Branje, Karina; Shaw, Julia; Grudzinski, Alexa L.; Barone, Natasha; Gillis, Chelsia	Prehabil Knowledge Network			BRITISH JOURNAL OF ANAESTHESIA	FEB 2022	2022	128	2				244	257		10.1016/j.bja.2021.11.014			61	20.33	0	0	0	0	0	0	0	0	0	20	38	58
Hypotension during propofol sedation for colonoscopy: a retrospective exploratory analysis and meta-analysis	Sneyd, J. Robert; Absalom, Anthony R.; Barends, Clemens R. M.; Jones, Jordan B.				BRITISH JOURNAL OF ANAESTHESIA	APR 2022	2022	128	4				610	622		10.1016/j.bja.2021.10.044			46	15.33	0	0	0	0	0	0	0	0	0	11	33	44
Short-term impact of combining pain neuroscience education with exercise for chronic musculoskeletal pain: a systematic review and meta-analysis	Siddall, Benjamin; Ram, Adrian; Jones, Matthew D.; Booth, John; Perriman, Diana; Summers, Simon J.				PAIN	JAN 2022	2022	163	1				E20	E30		10.1097/j.pain.0000000000002308			42	14	0	0	0	0	0	0	0	0	3	13	25	41
Analgesic efficacy of erector spinae plane block in lumbar spine surgery: A systematic review and meta-analysis	Oh, Seok Kyeong; Lim, Byung Gun; Won, Young Ju; Lee, Dong Kyu; Kim, Seong Shin				JOURNAL OF CLINICAL ANESTHESIA	JUN 2022	2022	78							110647	10.1016/j.jclinane.2022.110647			36	12	0	0	0	0	0	0	0	0	0	9	24	33
Investigating the veracity of a sample of divergent published trial data in spinal pain	O'Connell, Neil E.; Moore, R. Andrew; Stewart, Gavin; Fisher, Emma; Hearn, Leslie; Eccleston, Christopher; Williams, Amanda C. de C.				PAIN	JAN 2023	2023	164	1				72	83		10.1097/j.pain.0000000000002659			16	8	0	0	0	0	0	0	0	0	0	4	12	16
Combination pharmacotherapy for the treatment of neuropathic pain in adults: systematic review and meta-analysis	Balanaser, Marielle; Carley, Meg; Baron, Ralf; Finnerup, Nanna B. B.; Moore, R. Andrew; Rowbotham, Michael C. C.; Chaparro, Luis E. E.; Gilron, Ian				PAIN	FEB 2023	2023	164	2				230	251		10.1097/j.pain.0000000000002688			15	7.5	0	0	0	0	0	0	0	0	0	1	13	14
Blinding and sham control methods in trials of physical, psychological, and self-management interventions for pain (article I): a systematic review and description of methods	Hohenschurz-Schmidt, David; Draper-Rodi, Jerry; Vase, Lene; Scott, Whitney; McGregor, Alison; Soliman, Nadia; MacMillan, Andrew; Olivier, Axel; Cherian, Cybill Ann; Corcoran, Daniel; Abbey, Hilary; Freigang, Sascha; Chan, Jessica; Phalip, Jules; Sorensen, Lea Norgaard; Delafin, Maite; Baptista, Margarida; Medforth, Naomi R.; Ruffini, Nuria; Andresen, Stephanie Skott; Ytier, Sylvain; Ali, Dorota; …				PAIN	MAR 2023	2023	164	3				469	484		10.1097/j.pain.0000000000002723			11	5.5	0	0	0	0	0	0	0	0	0	2	9	11
Do central sensitization questionnaires reflect measures of nociceptive sensitization or psychological constructs? A systematic review and meta-analyses	Adams, Greig R. R.; Gandhi, Wiebke; Harrison, Richard; van Reekum, Carien M. M.; Wood-Anderson, Desmond; Gilron, Ian; Salomons, Tim V. V.				PAIN	JUN 2023	2023	164	6				1222	1239		10.1097/j.pain.0000000000002830			9	4.5	0	0	0	0	0	0	0	0	0	0	9	9
Blinding and sham control methods in trials of physical, psychological, and self-management interventions for pain (article II): a meta-analysis relating methods to trial results	Hohenschurz-Schmidt, David; Draper-Rodi, Jerry; Vase, Lene; Scott, Whitney; McGregor, Alison; Soliman, Nadia; MacMillan, Andrew; Olivier, Axel; Cherian, Cybill Ann; Corcoran, Daniel; Abbey, Hilary; Freigang, Sascha; Chan, Jessica; Phalip, Jules; Sorensen, Lea Norgaard; Delafin, Maite; Baptista, Margarida; Medforth, Naomi R.; Ruffini, Nuria; Andresen, Stephanie Skott; Ytier, Sylvain; Ali, Dorota; …				PAIN	MAR 2023	2023	164	3				509	533		10.1097/j.pain.0000000000002730			8	4	0	0	0	0	0	0	0	0	0	2	6	8
